# Supplementary material
Source: PubMed Central journal article supplement (PMC8608689)
Supplement: NIHMS1707563-supplement-1.pdf [file NIHMS1707563-supplement-1.pdf]

**Figure S1.** Consort Diagram

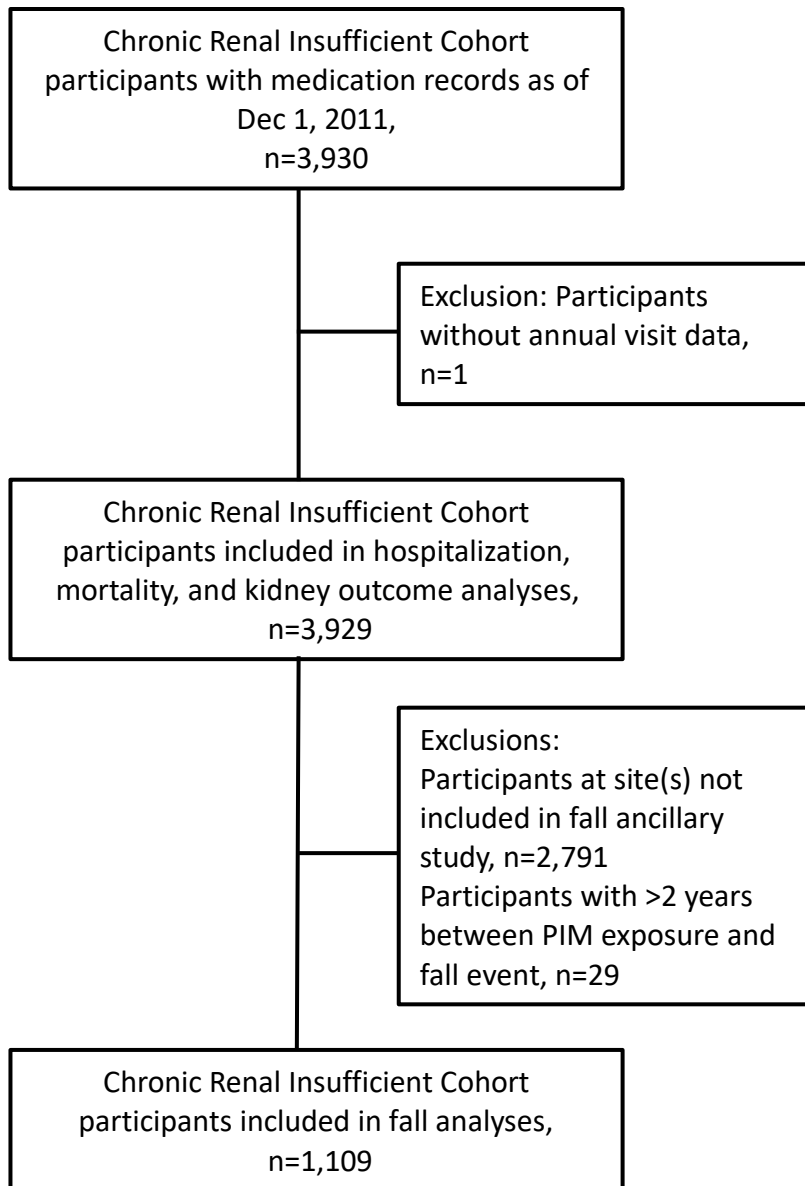

**Table S1.** Potentially Inappropriate Medications Included in Exposure Variable

| <b>Category</b>  | <b>Medication Name(s)</b>                                                                                                                                                                                                                                                                  |
|------------------|--------------------------------------------------------------------------------------------------------------------------------------------------------------------------------------------------------------------------------------------------------------------------------------------|
| Anticholinergics | First-generation antihistamines<br>Brompheniramine<br>Carbinoxamine<br>Chlorpheniramine<br>Clemastine<br>Cyproheptadine<br>Dexbrompheniramine<br>Dexchlorpheniramine<br>Dimenhydrinate<br>Diphenhydramine (oral)<br>Doxylamine<br>Hydroxyzine<br>Meclizine<br>Promethazine<br>Triprolidine |
|                  | Anti-parkinsonian agents<br>Benztropine (oral)<br>Trihexyphenidyl                                                                                                                                                                                                                          |
|                  | Antispasmodics<br>Atropine (excludes ophthalmic)<br>Belladonna alkaloids<br>Clidinium-Chlordiazepoxide<br>Dicyclomine<br>Hyoscyamine<br>Propantheline<br>Scopolamine                                                                                                                       |
| Antithrombotics  | Dipyridamole                                                                                                                                                                                                                                                                               |
|                  | Ticlopidine                                                                                                                                                                                                                                                                                |
| Anti-infective   | Nitrofurantoin                                                                                                                                                                                                                                                                             |
| Cardiovascular   | Peripheral alpha-1 blockers<br>Doxazosin<br>Prazosin<br>Terazosin                                                                                                                                                                                                                          |
|                  | Central alpha blockers<br>Clonidine<br>Guanabenz<br>Guanfacine<br>Methyldopa<br>Reserpine                                                                                                                                                                                                  |
|                  | Disopyramide                                                                                                                                                                                                                                                                               |
|                  | Dronedarone                                                                                                                                                                                                                                                                                |
|                  | Digoxin                                                                                                                                                                                                                                                                                    |
|                  | Nifedipine (immediate release)                                                                                                                                                                                                                                                             |
|                  | Amiodarone                                                                                                                                                                                                                                                                                 |
|                  | Central Nervous System                                                                                                                                                                                                                                                                     |

|           |                                                                                                                                                                                                                                       |
|-----------|---------------------------------------------------------------------------------------------------------------------------------------------------------------------------------------------------------------------------------------|
|           | Clomipramine<br>Desipramine<br>Doxepin<br>Imipramine<br>Nortriptyline<br>Paroxetine<br>Protriptyline<br>Trimipramine                                                                                                                  |
|           | Anti-psychotics (first- and second-generation)                                                                                                                                                                                        |
|           | Barbiturates<br>Amobarbital<br>Butabarbital<br>Butalbital<br>Mephobarbital<br>Pentobarbital<br>Phenobarbital<br>Secobarbital                                                                                                          |
|           | Benzodiazepines<br>Short- and Intermediate-acting<br>Alprazolam<br>Estazolam<br>Lorazepam<br>Oxazepam<br>Temazepam<br>Triazolam<br>Long-acting<br>Clorazepate<br>Chlordiazepoxide<br>Clonazepam<br>Diazepam<br>Flurazepam<br>Quazepam |
|           | Meprobamate                                                                                                                                                                                                                           |
|           | Nonbenzodiazepine, benzodiazepine receptor<br>agonist hypnotics<br>Eszopiclone<br>Zolpidem<br>Zaleplon                                                                                                                                |
|           | Ergoloid mesylates<br>Isoxsuprine                                                                                                                                                                                                     |
| Endocrine | Androgens<br>Methyltestosterone<br>Testosterone                                                                                                                                                                                       |
|           | Desiccated thyroid                                                                                                                                                                                                                    |
|           | Estrogens (with or without progesterone)                                                                                                                                                                                              |
|           | Growth hormone                                                                                                                                                                                                                        |
|           | Insulin                                                                                                                                                                                                                               |
|           | Megestrol                                                                                                                                                                                                                             |
|           | Sulfonylureas (long-duration)<br>Chlrorpropamide                                                                                                                                                                                      |

|                  |                                            |
|------------------|--------------------------------------------|
|                  | Glyburide                                  |
| Gastrointestinal | Metoclopramide                             |
|                  | Mineral oil (oral)                         |
|                  | Proton-pump inhibitors                     |
| Pain Medications | Meperidine                                 |
|                  | Non-cyclooxygenase-selective NSAIDS (oral) |
|                  | Aspirin                                    |
|                  | Diflunisal                                 |
|                  | Etodolac                                   |
|                  | Fenoprofen                                 |
|                  | Ibuprofen                                  |
|                  | Ketoprofen                                 |
|                  | Meclofenamate                              |
|                  | Mefenamic acid                             |
|                  | Meloxicam                                  |
|                  | Nabumetone                                 |
|                  | Naproxen                                   |
|                  | Oxaprozin                                  |
|                  | Piroxicam                                  |
|                  | Sulindac                                   |
|                  | Tolmetin                                   |
|                  | Indomethacin                               |
|                  | Ketorolac                                  |
|                  |                                            |
|                  | Skeletal muscle relaxants                  |
|                  | Carisoprodol                               |
|                  | Chlorzoxazone                              |
|                  | Cyclobenzaprine                            |
|                  | Metaxalone                                 |
|                  | Methocarbamol                              |
|                  | Orphenadrine                               |
| Genitourinary    | Desmopressin                               |

**Table S2.** Baseline Cohort Characteristics based on Ever taking a PIM during study observation period

| <b>Characteristic</b>                    | <b>Overall<br/>N= 3929</b> | <b>Ever PIM<br/>N= 3151</b> | <b>Never PIM<br/>N=778</b> |
|------------------------------------------|----------------------------|-----------------------------|----------------------------|
| <b>Demographics</b>                      |                            |                             |                            |
| Age (years)                              | 57.7 (10.9)                | 58.4 (10.4)                 | 54.8 (12.5)                |
| Age <65                                  | 2789 (71.0%)               | 2200 (69.8%)                | 589 (75.7%)                |
| Age 65-70                                | 741 (18.9%)                | 608 (19.3%)                 | 133 (17.1%)                |
| Age >70                                  | 399 (10.2%)                | 343 (10.9%)                 | 56 (7.2%)                  |
| Female                                   | 1775 (45.2%)               | 1466 (46.5%)                | 309 (39.7%)                |
| Non-Hispanic Black                       | 1646 (41.9%)               | 1356 (43%)                  | 290 (37.3%)                |
| Non-Hispanic White                       | 1635 (41.6%)               | 1333 (42.3%)                | 302 (38.8%)                |
| Hispanic                                 | 495 (12.6%)                | 349 (11.1%)                 | 146 (18.8%)                |
| Other                                    | 153 (3.9%)                 | 113 (3.6%)                  | 40 (5.1%)                  |
| <b>Clinical Characteristics</b>          |                            |                             |                            |
| eGFR                                     | 44.8 (16.8)                | 45.0 (16.8)                 | 44.1 (16.5)                |
| Chronic Kidney Disease Stage at Baseline |                            |                             |                            |
| Stage I/II                               | 694 (17.7%)                | 569 (18.1%)                 | 125 (16.1%)                |
| Stage IIIA                               | 1090 (27.7%)               | 876 (27.8%)                 | 214 (27.5%)                |
| Stage IIIB                               | 1338 (34.1%)               | 1066 (33.8%)                | 272 (35%)                  |
| Stage IV/V                               | 807 (20.5%)                | 640 (20.3%)                 | 167 (21.5%)                |
| Urine Protein/Creatinine Ratio           | 1.0 (2.4)                  | 1.0 (2.4)                   | 1.2 (2.3)                  |
| BMI Categories                           |                            |                             |                            |
| BMI >30                                  | 2174 (55.5%)               | 1824 (58.1%)                | 350 (45%)                  |
| BMI 25-30                                | 1121 (28.6%)               | 853 (27.2%)                 | 268 (34.4%)                |
| BMI <25                                  | 623 (15.9%)                | 463 (14.7%)                 | 160 (20.6%)                |
| Diabetes                                 | 1908 (48.6%)               | 1556 (49.4%)                | 352 (45.2%)                |
| CVD                                      | 1315 (33.5%)               | 1116 (35.4%)                | 199 (25.6%)                |
| Hypertension                             | 3390 (86.3%)               | 2741 (87%)                  | 649 (83.4%)                |
| Arthritis                                | 492 (13.2%)                | 432 (14.5%)                 | 60 (8.1%)                  |
| Number of Medications                    | 8.9 (4.5)                  | 9.5 (4.6)                   | 6.3 (3.3)                  |
| Number of PIMs                           | 0.9 (1.1)                  | 1.2 (1.1)                   | 0.0 (0.0)                  |
| Nephrology Care                          | 2596 (66.1%)               | 2071 (65.7%)                | 525 (67.5%)                |

Data reported as N (%) or mean (SD)

Abbreviations: BMI, body mass index; CVD, cardiovascular disease, eGFR, estimated glomerular filtration rate; PIM, potentially inappropriate medication

**Table S3.** Sensitivity analysis of fully adjusted model (Model 3) with additional adjustment for number of hospitalizations reported from the prior year

|                                      |          | OR (95% CI) or RR (95% CI) <sup>a</sup> |
|--------------------------------------|----------|-----------------------------------------|
| Outcome                              | Exposure | Adjusted Model <sup>b</sup>             |
| Hospitalizations                     | No PIM   | [Reference]                             |
|                                      | 1 PIM    | 1.09 (1.00 - 1.17)                      |
|                                      | 2 PIMs   | 1.18 (1.07 - 1.30)                      |
|                                      | ≥3 PIMs  | 1.25 (1.11 - 1.42)                      |
|                                      | Any PIM  | 1.12 (1.04 - 1.20)                      |
| Death                                | No PIM   | [Reference]                             |
|                                      | 1 PIM    | 1.18 (0.91, 1.54)                       |
|                                      | 2 PIMs   | 1.61 (1.20, 2.15)                       |
|                                      | ≥3 PIMs  | 1.62 (1.11, 2.37)                       |
|                                      | Any PIM  | 1.34 (1.06, 1.69)                       |
| KRT                                  | No PIM   | [Reference]                             |
|                                      | 1 PIM    | 1.20 (0.95, 1.52)                       |
|                                      | 2 PIMs   | 1.11 (0.82, 1.51)                       |
|                                      | ≥3 PIMs  | 1.12 (0.72, 1.74)                       |
|                                      | Any PIM  | 1.18 (0.94, 1.46)                       |
| Renal Composite outcome <sup>c</sup> | No PIM   | [Reference]                             |
|                                      | 1 PIM    | 1.13 (0.93, 1.38)                       |
|                                      | 2 PIMs   | 1.06 (0.82, 1.37)                       |
|                                      | ≥3 PIMs  | 1.12 (0.78, 1.62)                       |
|                                      | Any PIM  | 1.11 (0.93, 1.34)                       |
| Falls                                | No PIM   | [Reference]                             |
|                                      | 1 PIM    | 1.34 (0.87, 2.08)                       |
|                                      | 2 PIMs   | 1.25 (0.70, 2.24)                       |
|                                      | ≥3 PIMs  | 2.72 (1.46, 5.08)                       |
|                                      | Any PIM  | 1.44 (0.97, 2.14)                       |

Abbreviations: PIM, potentially inappropriate medications; KRT, initiation of kidney replacement therapy; OR, odds ratio; RR, rate ratio

<sup>a</sup>Rate ratio for hospitalization model

<sup>b</sup>Model is adjusted for age, other demographics and participant site, eGFR, BMI, diabetes, any CVD, hypertension, arthritis, and prior nephrology care, number of medications, and number of hospitalizations in the prior year

<sup>c</sup>Renal composite outcome is defined as occurrence of ESKD or halving of baseline estimated glomerular filtration rate

**Table S4.** Sensitivity analysis of fully adjusted model (Model 3) in a subgroup of visits from the cohort with eGFR<45

|                                      |          | OR (95% CI) or RR (95% CI) <sup>a</sup>          |
|--------------------------------------|----------|--------------------------------------------------|
| Outcome                              | Exposure | Adjusted Model <sup>b</sup> for eGFR<45 subgroup |
| Hospitalizations                     | No PIM   | [Reference]                                      |
|                                      | 1 PIM    | 1.07 (0.99 - 1.17)                               |
|                                      | 2 PIMs   | 1.16 (1.03 - 1.30)                               |
|                                      | ≥3 PIMs  | 1.28 (1.11 - 1.46)                               |
|                                      | Any PIM  | 1.11 (1.02 - 1.20)                               |
| Death                                | No PIM   | [Reference]                                      |
|                                      | 1 PIM    | 1.23 (0.93, 1.65)                                |
|                                      | 2 PIMs   | 1.52 (1.10, 2.10)                                |
|                                      | ≥3 PIMs  | 1.45 (0.95, 2.21)                                |
|                                      | Any PIM  | 1.33 (1.02, 1.73)                                |
| KRT                                  | No PIM   | [Reference]                                      |
|                                      | 1 PIM    | 1.15 (0.92, 1.43)                                |
|                                      | 2 PIMs   | 1.06 (0.79, 1.42)                                |
|                                      | ≥3 PIMs  | 1.20 (0.80, 1.80)                                |
|                                      | Any PIM  | 1.13 (0.91, 1.39)                                |
| Renal Composite outcome <sup>c</sup> | No PIM   | [Reference]                                      |
|                                      | 1 PIM    | 1.05 (0.87, 1.28)                                |
|                                      | 2 PIMs   | 1.02 (0.79, 1.32)                                |
|                                      | ≥3 PIMs  | 1.18 (0.82, 1.69)                                |
|                                      | Any PIM  | 1.05 (0.88, 1.26)                                |
| Falls                                | No PIM   | [Reference]                                      |
|                                      | 1 PIM    | 0.98 (0.54, 1.81)                                |
|                                      | 2 PIMs   | 0.82 (0.35, 1.90)                                |
|                                      | ≥3 PIMs  | 3.76 (1.65, 8.55)                                |
|                                      | Any PIM  | 1.14 (0.67, 1.94)                                |

Abbreviations: PIM, potentially inappropriate medications; KRT, initiation of kidney replacement therapy; OR, odds ratio; RR, rate ratio

<sup>a</sup>Rate ratio for hospitalization model

<sup>b</sup>Model is adjusted for age, other demographics and participant site, eGFR, BMI, diabetes, any CVD, hypertension, arthritis, and prior nephrology care, number of medications

<sup>c</sup>Renal composite outcome is defined as occurrence of ESKD or halving of baseline estimated glomerular filtration rate

**Table S5.** Number of all visits (Rate) when PIMs reported used by Cohort Members who died in Total and By Age Group

| <b>Medication</b>      | <b>Total</b> | <b>Age &lt;65</b> | <b>Age 65-70</b> | <b>Age &gt;70</b> | <b>P-value</b> |
|------------------------|--------------|-------------------|------------------|-------------------|----------------|
| proton pump inhibitor  | 601 (35.1)   | 297 (31.9)        | 134 (32.3)       | 170 (34.7)        | 0.7            |
| Alpha blockers         | 311 (18.2)   | 84 (9.0)          | 110 (26.5)       | 117 (23.9)        | <0.001         |
| central alpha agonists | 256 (14.9)   | 168 (18.0)        | 51 (12.3)        | 37 (7.6)          | <0.001         |
| antidepressants        | 190 (11.1)   | 125 (13.4)        | 20 (4.8)         | 45 (9.2)          | <0.001         |
| anticholinergic        | 184 (10.7)   | 96 (10.3)         | 35 (8.4)         | 53 (10.8)         | 0.5            |
| NSAIDS                 | 161 (9.4)    | 84 (9.0)          | 28 (6.8)         | 49 (10.0)         | 0.2            |
| benzodiazepines        | 146 (8.5)    | 85 (9.1)          | 25 (6.0)         | 36 (7.4)          | 0.1            |
| digoxin                | 138 (8.1)    | 69 (7.4)          | 36 (8.7)         | 33 (6.7)          | 0.6            |
| metoclopramide         | 85 (5.0)     | 64 (6.9)          | 12 (2.9)         | 9 (1.8)           | <0.001         |
| amiodarone             | 70 (4.1)     | 30 (3.2)          | 13 (3.1)         | 27 (5.5)          | 0.1            |
| muscle relaxant        | 66 (3.9)     | 44 (4.7)          | 12 (2.9)         | 10 (2.0)          | 0.02           |
| antispasmodics         | 47 (2.7)     | 21 (2.3)          | 11 (2.7)         | 15 (3.1)          | 0.7            |
| antipsychotic          | 44 (2.6)     | 34 (3.7)          | 5 (1.2)          | 5 (1.0)           | 0.001          |
| Z-drugs                | 34 (2.0)     | 20 (2.1)          | 3 (0.7)          | 11 (2.2)          | 0.1            |

This is list of the most common PIMs among those who died during follow-up.

Data expressed as number of visits (rate)

Rate defined as number of PIMs per 100 person-year

Age group is based on age at reported medication use



**Table S6.** Adjusted association between common PIMs in the cohort [proton pump inhibitors (PPIs) and alpha blockers] and adverse outcomes of hospitalization and death

| Outcome          | Exposure          | OR (95% CI) or RR (95% CI) <sup>a</sup> |                      |                      |                      |
|------------------|-------------------|-----------------------------------------|----------------------|----------------------|----------------------|
|                  |                   | Unadjusted                              | Model 1 <sup>b</sup> | Model 2 <sup>c</sup> | Model 3 <sup>d</sup> |
| Hospitalizations | No PPI            | [Reference]                             | [Reference]          | [Reference]          | Reference            |
|                  | Any PPI           | 1.28 (1.17 - 1.39)                      | 1.28 (1.17 - 1.39)   | 1.21 (1.12 - 1.31)   | 1.13 (1.04 - 1.23)   |
|                  | No alpha blocker  | [Reference]                             | [Reference]          | [Reference]          | Reference            |
|                  | Any alpha blocker | 1.15 (1.02 - 1.29)                      | 1.16 (1.03 - 1.31)   | 1.16 (1.04 - 1.31)   | 1.09 (0.97 - 1.23)   |
| Death            | No PPI            | [Reference]                             | Reference            | Reference            | Reference            |
|                  | Any PPI           | 1.55 (1.27, 1.89)                       | 1.45 (1.19, 1.78)    | 1.25 (1.00, 1.56)    | 1.11 (0.88, 1.40)    |
|                  | No alpha blocker  | [Reference]                             | [Reference]          | [Reference]          | Reference            |
|                  | Any alpha blocker | 1.45 (1.12, 1.86)                       | 1.01 (0.77, 1.31)    | 0.91 (0.68, 1.23)    | 0.81 (0.60, 1.09)    |

Abbreviations: PPIs, proton pump inhibitors, OR, odds ratio; RR, rate ratio

<sup>a</sup>Relative risk for hospitalization model

<sup>b</sup>Model 1 adjusted for age, other demographics and participant site.

<sup>c</sup>Model 2 is adjusted for Model 1 covariates and eGFR, BMI, diabetes, any CVD, hypertension, arthritis, and prior nephrology care.

<sup>d</sup>Model 3 is adjusted for Model 2 covariates and number of medications
